# Supplementary material
Source: PubMed Central journal article supplement (PMC6322414)

**Molecular Cell, Volume 68**

**Supplemental Information**

**The Role of N- $\alpha$ -acetyltransferase 10 Protein  
in DNA Methylation and Genomic Imprinting**

**Chen-Cheng Lee, Shih-Huan Peng, Li Shen, Chung-Fan Lee, Ting-Huei Du, Ming-Lun Kang, Guo-Liang Xu, Anup K. Upadhyay, Xiaodong Cheng, Yu-Ting Yan, Yi Zhang, and Li-Jung Juan**

## SUPPLEMENTAL INFORMATION

Supplemental Information includes seven figures and seven tables.

### Supplemental Tables

#### **Table S1 (related to Figure 1). *Naa10*-KO Mice Show Reduced Birthrate.**

Birthrates of mice with six different *Naa10* genotypes from *Naa10*-heterozygous (-/X) female mice crossed with WT (X/Y) male or *Naa10*-KO male (-/Y) mice were calculated. Total 48 and 41 mice from *Naa10*-heterozygous female mice crossed with WT male and *Naa10*-KO male mice were obtained, respectively. *Naa10*-KO male mice showed a birthrate of 15-17%, which is lower than the expected 25%. A lower birthrate of 12% was also observed for *Naa10*<sup>-/-</sup> female mice. The *P*-value was calculated by the chi-square test.

#### **Table S2 (related to Figure 1). *Naa10p*-KO Mice Show Partial Embryonic Lethality.**

Embryonic lethality was estimated in 7 litters from *Naa10*<sup>-/X</sup> female mice crossed with WT male (Litter 1 ~ 7) or *Naa10*-KO male (Litter 8 ~ 14) mice. Number with brackets indicates the amount of dead embryos. Embryos of 35% of *Naa10*-KO males (n=23 from 13 litters) and 27% of *Naa10*-KO females (n=11 from 5 litters) died with developmental defects during embryonic days 12.5-14.5. In addition, 18% embryonic lethality was observed for heterozygous *Naa10*<sup>-/x</sup> embryos (n=11 from 6 litters), but no lethality was observed for heterozygous *Naa10*<sup>x/-</sup> embryos (n=16 from 6 litters). Images of the embryos of 2 representative litters (Litter 1 and Litter 14) are shown in figure S1B.

#### **Table S3 (related to Figure 1). *Naa10p*-KO Mice Develop Hydrocephalus Brain.**

Percentages of hydrocephalic *Naa10*-KO mice with dome-shaped skull are shown. Images of 2 representatives of the *Naa10*-KO mice with dome-shaped skull are shown in figure S1E.

#### **Table S4 (related to Figure 2). *Naa10p*-KO Deregulates Imprinted Gene Expression in Mouse ESCs.**

The expression of imprinted genes in the RNA-seq results from figure 2 is shown (Fold change > 1.5 & FPKM > 0.4). Red: up-regulated genes in KO cells. Green: down-regulated genes in KO cells. Fold change = FPKM of KO / average FPKM of WT#1 and WT#2.

**Table S5 (related to STAR METHODS). Primers for Genotyping and Quantitative PCR.**

**Table S6 (related to STAR METHODS). Primers for Chromatin Immunoprecipitation.**

**Table S7 (related to STAR METHODS). Primers for Bisulfite Sequencing, EMSA Probes, and Site-directed Mutagenesis.**

### **Supplemental Figures**

**Figure S1 (related to Figure 1). Generation and Characterization of *Naa10*-KO Mice.**

(A) Generation of *Naa10*-KO mice. Top: Schematic illustration of gene targeting strategy used to generate *Naa10*-KO mouse ESCs. A 17.7 kb genomic fragment of *Naa10* was subcloned from a BAC clone (Sanger Institute, UK) into the PL235 plasmid, followed by insertion of loxp into the first and sixth introns and the neomycin resistance gene (*Neo*) cassette flanked by FRT into the sixth intron before loxp (Lee et al., 2001), by which exon 2 to 6 and *Neo* cassette were flanked by loxp sites. The resulting construct was linearized and electroporated into R1 ES cell (129 Sv/Ev) to generate *Naa10*-KO mice (see STAR METHODS). Bottom left: Southern blot confirmation of *Naa10* deletion. Analysis of WT (*Naa10*<sup>X/X</sup>) and *Naa10*-heterozygous (*Naa10*<sup>-X</sup>) female mice is shown. Bottom right: Western blotting shows that Naa10p is undetectable in the *Naa10*-KO (*Naa10*<sup>-Y</sup>) MEF.

(B) *Naa10*p-KO mice show partial embryonic lethality. Images of the embryos at 13.5 dpc of 2 representative litters from *Naa10*-heterozygous female mice crossed with WT male (Litter 1) or *Naa10*-KO male (Litter 14) mice are shown.

(C) Positive correlation between embryo size and placenta weight in defective *Naa10*-KO female embryos. Embryo size and placenta weight were measured for embryonic day 13.5 embryos of WT (*Naa10*<sup>X/X</sup>, n=6) and mutant (*Naa10*<sup>-X</sup>, n=10;

*Naa10*<sup>-/-</sup>, n=7), derived from *Naa10*<sup>-X</sup> females crossed with WT or *Naa10*-KO males. Representative images of embryos (#161, #166 and #167) and their placentae are shown. Embryo size is plotted vs. placenta weight for each individual. The correlation ( $R^2$ ) and the p-value for the Pearson analysis are shown.

- (D) *Naa10* KO results in placental defects in female embryos. Representative images of haematoxylin and eosin-stained female WT (#161) and *Naa10*-KO (#167) placentae at 13.5 dpc are shown. Regions in black rectangles are enlarged in the lower panels. De, decidual; Ch, chorionic plate; Gi, trophoblast giant cells; La; labyrinthine zone; Sp, spongioblast.
- (E) *Naa10*-KO mice spontaneously develop hydrocephalus. Left: Representative images of *Naa10*p-KO mice with dome-shaped skull. Right: Histological analysis of brain coronal section. The *Naa10*-KO mice with short life span show enlarged lateral ventricle of hemisphere and significantly dilated third ventricle. Results are from two representative mice (4 and 5 weeks old) of WT, *Naa10*-KO without dome-shaped (ds) skull, and *Naa10*-KO with ds skull.

**Figure S2 (related to Figure 2). *Naa10*p KO Deregulates Developmental Genes including Imprinted Genes in Mouse ESCs.**

- (A) *Naa10*p KO does not alter morphology of mouse ESCs. Phase-contrast images of three independent clones of WT (*Naa10*<sup>X/Y</sup>) and *Naa10*-KO (*Naa10*<sup>-Y</sup>) ESCs cultured in N2B27 medium supplemented with Mek inhibitor PD325901, Gsk3 inhibitor Chir99021, and leukemia inhibitory factor (LIF) are shown.
- (B) *Naa10*p KO does not alter the expression of pluripotency marker genes. mRNA levels of *Nanog* and *Oct4* in three independent WT and *Naa10*-KO ESC clones were examined by RT-qPCR. Error bars represent standard deviation determined from triplicate PCR reactions.
- (C) *Naa10*p KO deregulates developmental genes in mouse ESCs. Heatmaps and GO term analysis of *Naa10*p-regulated genes are shown. Differentially expressed genes from two clones each of WT (*Naa10*<sup>X/Y</sup>) and *Naa10*-KO (*Naa10*<sup>-Y</sup>) hybrid ESCs used in figure 2 were analyzed by RNA-seq. 540 and 1002 genes were up (red)- or down (green)-regulated in both KO ESCs, respectively, [fragments per kilobase of exon per million reads mapped (FPKM) > 0.4, fold change > 1.5].



- (D) *Naa10p* KO increases gene expression from the imprinted allele in ESCs. Biological repeats (WT#2 and KO#2) for figure 2E are shown.
- (E) Imprinted genes regulated by *Naa10p*, *Zfp57* and *Trim28*. Van diagram comparison of the differentially expressed imprinted genes in a *Zfp57*-KO (Quenneville et al., 2011) and two *Trim28*-KO mouse ESCs (Cheng et al., 2014) with those differentially expressed in two *Naa10*-KO ESCs (**Figure 2C and Table S4**). For RNA-seq data, imprinted genes with fold change > 1.5 and FPKM > 0.4 are shown. For microarray, imprinted genes with fold change > 1.5 are shown. Number with brackets indicates numbers of total imprinted genes changed in the category. Genes with \* are those affected in both *Naa10*-KO ESCs. Genes with # are those affected in both *Trim28*-KO ESCs.

**Figure S3 (related to Figure 3). *Naa10p* KO Causes DNA Hypomethylation without Altering DNA Methyltransferase and Demethylase Levels.**

- (A) *Naa10p* KO dysregulates allele-specific imprinted gene methylation in ESCs. Biological repeats (WT#2 and KO#2) for figure 3A are shown.
- (B) *Naa10p* KO results in global DNA hypomethylation. Shown are the mean DNA methylation levels of two wild-type (WT#1 and WT#2) and *Naa10*-knockout (KO#1 and KO#2) mESCs in various genic and repetitive sequences, and in subcategories of LTR repeats.
- (C) *Naa10p* KO does not alter the nuclear protein levels of DNA methyltransferases, demethylases, *Zfp57* and *Trim28* in ESCs. Protein levels of indicated genes in the nuclear extracts of WT and *Naa10*-KO ESCs were analyzed by western blotting. *Dnmt*-TKO, mESCs depleted of *Dnmt1/3a/3b*.
- (D) *Naa10p* KO does not disrupt the interaction between *Dnmt1* and *Uhrf1* in ESCs. Co-immunoprecipitation followed by western blot analysis shows that *Uhrf1* is co-immunoprecipitated with *Dnmt1* Ab in both WT and *Naa10*-KO ESCs but not mESCs depleted of *Dnmt1* (*Dnmt1*-KO). IP, immunoprecipitation.

**Figure S4 (related to Figure 4). *Naa10p* KO Barely Affects *Dnmt3a/3b* Activities but Impairs *Dnmt1* Binding to Multiple ICRs/DMRs in Mouse ESCs.**

- (A) *Naa10p* effect on *Dnmt3a/3b* activities in nuclear extracts of mouse ESCs is limited. Nuclear extracts from two WT, two *Naa10*-KO or the *Dnmt*-TKO ESCs were incubated with non-methylated double-stranded DNA oligonucleotides and

[<sup>3</sup>H]-S-adenosyl-L-methionine, followed by determination of radioactivity of the DNA oligonucleotides and western blotting (bottom). After subtracting the background signal of *Dnmt*-TKO cells, the relative Dnmt activity from each sample was normalized to the mean activity of WT replicates (middle). Data were presented as mean ± SD from biological repeats. Asterisks indicate statistical difference calculated by two-tail t-test, \*\*,  $p < 0.01$ . The figure shows that total Dnmt activity in the nuclear extracts was reduced by only 26% when a 34 bp non-methylated DNA oligo was used as the substrate. Because Dnmt1 can also methylate non-methylated DNA *in vitro* (Yokochi and Robertson, 2001), the Naa10p KO-mediated down-regulation of Dnmt3a/3b activities, if any, should have been less than 26%.

- (B) Cell cycle-sorted WT and Naa10p-KO mESCs. mESCs fixed with formaldehyde and stained with propidium iodide were analyzed for DNA content (PI) and cell size (FSC-A), followed by cell sorting. Numbers indicate the percentage/purity of each subset of cells.
- (C) Naa10p KO impairs Dnmt1 binding to multiple ICRs/DMRs during S phase in mouse ESCs. Biological repeats (WT#2 and KO#2) for figure 4C are shown. Error bars represent standard deviation determined from triplicate PCR reactions.
- (D) ChIP-qPCR analyses of *Zfp57* occupancy at five representative ICRs/DMRs in WT#1 and KO#1 ESCs are shown. Error bars represent standard deviation determined from triplicate PCR reactions.
- (E) Dnmt1 binding to non-imprinted regions is reduced in Naa10p-KO mESCs. ChIP-qPCR analyses of Dnmt1 occupancy at retrotransposon (IAP), repeat element (LINE) and four representative gene promoters in WT and Naa10p-KO mESC replicates are shown. Error bars represent standard deviation determined from triplicate PCR reactions. Asterisks indicate statistical difference calculated by two-tailed t-test, \*,  $p < 0.05$ ; \*\*,  $p < 0.01$ .

**Figure S5 (related to Figure 5). Naa10p Co-localizes with Dnmt1 at Multiple ICRs/DMRs in Mouse ESCs.**

Biological repeats (WT#2 and KO#2) of figure 5A are shown. Error bars represent standard deviation determined from triplicate PCR reactions. Asterisks indicate statistical difference calculated by two-tailed t-test, \*,  $p < 0.05$ ; \*\*,  $p < 0.01$ .

**Figure S6 (related to Figure 6). Analysis of Naa10p Binding to DNA in mESCs.**

- (A) Naa10p preferentially binds to distal intergenic regions. Pie charts show the genomic distribution of Naa10p occupancy in mESCs (right) as well as background annotation (left, mm9). The percentage of Naa10p occupancy at each genomic region is indicated. Distal promoter, 1-3 kb upstream of transcription start site (TSS). Proximal promoter, < 1 kb upstream of TSS. Immediate downstream, < 1 kb of transcription end site (TES). Proximal downstream, 1-3 kb downstream of TES. n, number of Naa10p peaks.
- (B) Naa10p binds to both parental alleles at non-imprinting regions. Genome browser views of two representative loci of non-imprinted regions show Naa10p binding peaks in WT (#1 and #2) and KO#1 ESCs. The ChIP-seq density profiles shown were normalized to density per million total reads with 25-bp resolution. Blue boxes: genes. Maternal B6 (red), paternal JF1 (blue).
- (C) Naa10p-bound sites are enriched for DNA methylation. Barplot comparing the mean DNA methylation levels of Naa10p-bound and -unbound regions in WT ESCs, the results of the integrated analysis of Naa10p ChIP-seq and RRBS are shown. Shown in each bar is the average DNA methylation of all CpGs calculated.
- (D) ICRs/DMRs bound by Naa10p are enriched for imprinted allele-specific SNPs. ICRs/DMRs ChIPed by Naa10p Ab from WT#1 ESC were analyzed by Sanger sequencing. Asterisks indicate SNPs on the imprinted allele.

**Figure S7 (related to Figure 7). WT Naa10p, but Not the Human Disease-associated Mutants, Directly Binds to *H19*-ICR and Nucleosomes.**

- (A) Naa10p specifically binds to the mouse *H19*-ICR. The binding of recombinant hNaa10p to the biotin-labeled 189 bp ChIP region of mouse *H19*-ICR was analyzed by EMSA in the absence or presence of anti-hNaa10p or cold probe. hNaa10p amount: 2  $\mu$ g (lanes 2-5 and 7-9). The Naa10p binding was specific because it could be disrupted with the Naa10p Ab and competed away with cold DNA probe. Lanes with the controls of antibody and BSA alone were eliminated from the original image to save space.
- (B) Mutations outside the GCXGXXG motif do not disrupt Naa10p binding. The binding of recombinant hNaa10p to the biotin-labeled 20-mer oligo of mouse

*H19*-ICR with or without mutations indicated in red was analyzed by EMSA. hNaa10p amount: 1  $\mu$ g (lanes 2 and 6); 2  $\mu$ g (lanes 3 and 7); 4  $\mu$ g (lanes 4 and 8). Lanes using DNA probe with irrelevant mutations were eliminated from the original image to save space.

(C) WT Naa10p, but not clinical-relevant mutants, binds to nucleosomes. EMSA of WT and mutant hNaa10p binding to the biotin-labeled 216 bp Widom DNA reconstituted with HeLa nucleosomes is shown. hNaa10p amount: 0.5  $\mu$ g (lanes 3, 6, 9 and 12); 1  $\mu$ g (lanes 4, 7, 10 and 13); 2  $\mu$ g (lanes 5, 8, 11 and 14).

(D) The GCXGXG motif is enriched at ICRs/DMRs. The GCXGXG motif in both ICRs/DMRs and the 10 kb-flanked regions was extracted. Frequency of motif per kb is shown for 10 representative ICRs/DMRs. Circle, maternally imprinted genes. Triangle, paternally imprinted genes. The -10k-flanked region of *H19* is known to harbor a somatic DMR.

**Table S1 (related to Figure 1)**

| <b>Reduced birthrate of <i>Naa10</i>-KO mice</b> |                                  |        |         |         |         |        |
|--------------------------------------------------|----------------------------------|--------|---------|---------|---------|--------|
|                                                  | <i>Naa10</i> genotype of progeny |        |         |         |         |        |
|                                                  | X/Y                              | -/Y    | X/X     | -/X     | X/-     | -/-    |
| Expected probability                             | 25%                              | 25%    | 25%     | 25%     | -       | -      |
| -/X x X/Y                                        | 35%                              | 15%    | 29%     | 21%     |         |        |
| <i>P</i> =0.025                                  | (17/48)                          | (7/48) | (14/48) | (10/48) |         |        |
| Expected probability                             | 25%                              | 25%    | -       | -       | 25%     | 25%    |
| -/X x -/Y                                        | 32%                              | 17%    |         |         | 39%     | 12%    |
| <i>P</i> =0.0002                                 | (13/41)                          | (7/41) |         |         | (16/41) | (5/41) |

**Table S2 (related to Figure 1)**

| <b>Lethality of <i>Naa10</i>-KO embryo at 12.5 ~ 14.5 dpc</b> |                         |                                 |        |        |        |        |        |
|---------------------------------------------------------------|-------------------------|---------------------------------|--------|--------|--------|--------|--------|
|                                                               | <i>Naa10</i> of breeder | <i>Naa10</i> genotype of embryo |        |        |        |        |        |
|                                                               |                         | X/Y                             | -/Y    | X/X    | -/X    | X/-    | -/-    |
| Litter 1                                                      |                         | 1                               | 1(1)   | 2      | 2      | -      | -      |
| Litter 2                                                      |                         | 1                               | 1(1)   | 4      | 1      | -      | -      |
| Litter 3                                                      |                         | 3                               | 2      | 1      | 0      | -      | -      |
| Litter 4                                                      | -/X x X/Y               | 3                               | 0      | 0      | 1(1)   | -      | -      |
| Litter 5                                                      |                         | 2                               | 2      | 3      | 1      | -      | -      |
| Litter 6                                                      |                         | 1                               | 3(1)   | 2      | 3(1)   | -      | -      |
| Litter 7                                                      |                         | 1                               | 2(1)   | 2      | 3      | -      | -      |
| Litter 8                                                      |                         | 2                               | 2(1)   | -      | -      | 3      | 0      |
| Litter 9                                                      |                         | 1                               | 3(1)   | -      | -      | 0      | 3      |
| Litter 10                                                     |                         | 1                               | 1      | -      | -      | 2      | 2(1)   |
| Litter 11                                                     | -/X x -/Y               | 2                               | 1      | -      | -      | 1      | 0      |
| Litter 12                                                     |                         | 3                               | 1      | -      | -      | 3      | 3(1)   |
| Litter 13                                                     |                         | 1                               | 3(1)   | -      | -      | 4      | 1      |
| Litter 14                                                     |                         | 2                               | 1(1)   | -      | -      | 3      | 2(1)   |
| Lethality                                                     |                         | 0%                              | 35%    | 0%     | 18%    | 0%     | 27%    |
|                                                               |                         | (0/24)                          | (8/23) | (0/14) | (2/11) | (0/16) | (3/11) |

**Table S3 (related to Figure 1)**

***Naa10*-KO live birth mice with dome-shaped skull**

| Genotype of <i>Naa10</i> |         |        |           |        |
|--------------------------|---------|--------|-----------|--------|
| X/Y                      | -/Y     | X/X    | -/X & X/- | -/-    |
| 0%                       | 34%     | 0%     | 4%        | 31%    |
| (0/61)                   | (11/32) | (0/24) | (2/55)    | (4/13) |

**Table S4 (related to Figure 2C)**

| Imprinted Genes | Expressed Parental Allele | Fold Change |       |       |       |
|-----------------|---------------------------|-------------|-------|-------|-------|
|                 |                           | WT#1        | WT#2  | KO#1  | KO#2  |
| <i>Htr2a</i>    | M                         | 0.838       | 1.162 | 9.553 | 0.666 |
| <i>Dlk1</i>     | P                         | 1.075       | 0.925 | 8.583 | 2.318 |
| <i>Axl</i>      | M                         | 0.936       | 1.064 | 5.411 | 0.799 |
| <i>Peg10</i>    | P                         | 1.073       | 0.927 | 4.100 | 2.847 |
| <i>Wt1</i>      | M                         | 0.930       | 1.070 | 3.922 | 1.266 |
| <i>Peg13</i>    | P                         | 1.087       | 0.913 | 3.654 | 1.802 |
| <i>Osbp15</i>   | M                         | 0.974       | 1.026 | 3.627 | 0.854 |
| <i>Rtl1</i>     | P                         | 0.997       | 1.003 | 3.484 | 3.954 |
| <i>Tfpi2</i>    | M                         | 0.763       | 1.237 | 3.002 | 0.062 |
| <i>Tnfrsf23</i> | M                         | 0.973       | 1.027 | 2.211 | 0.837 |
| <i>Pon3</i>     | M                         | 1.096       | 0.904 | 2.140 | 1.149 |
| <i>Ndn</i>      | P                         | 1.008       | 0.992 | 2.117 | 1.414 |
| <i>H13</i>      | M                         | 0.971       | 1.029 | 2.076 | 0.833 |
| <i>Kcnq1ot1</i> | P                         | 1.241       | 0.759 | 1.976 | 1.897 |
| <i>Pon2</i>     | M                         | 1.016       | 0.984 | 1.888 | 1.195 |
| <i>Mest</i>     | P                         | 1.014       | 0.986 | 1.868 | 1.653 |
| <i>Sfmbt2</i>   | P                         | 0.945       | 1.055 | 1.810 | 2.585 |
| <i>Nnat</i>     | P                         | 1.027       | 0.973 | 1.805 | 1.447 |
| <i>Impact</i>   | P                         | 0.964       | 1.036 | 1.718 | 1.158 |
| <i>Klf14</i>    | M                         | 1.116       | 0.884 | 1.664 | 1.031 |
| <i>Meg3</i>     | M                         | 0.97        | 1.029 | 1.646 | 0.978 |
| <i>Blcap</i>    | M                         | 0.997       | 1.003 | 1.615 | 1.056 |
| <i>H19</i>      | M                         | 1.131       | 0.869 | 1.612 | 2.202 |
| <i>Casd1</i>    | M                         | 0.962       | 1.038 | 1.598 | 1.736 |
| <i>Dcn</i>      | M                         | 0.917       | 1.083 | 1.597 | 0.258 |
| <i>Peg3</i>     | P                         | 1.036       | 0.964 | 1.588 | 1.587 |
| <i>Gnas</i>     | M                         | 0.993       | 1.007 | 1.561 | 0.937 |
| <i>Gatm</i>     | M                         | 0.985       | 1.015 | 1.551 | 1.004 |
| <i>Snrpn</i>    | P                         | 1.005       | 0.994 | 1.533 | 1.557 |
| <i>Sgce</i>     | P                         | 0.997       | 1.003 | 1.500 | 1.561 |
| <i>Phlda2</i>   | M                         | 0.983       | 1.017 | 1.463 | 1.121 |
| <i>Magel2</i>   | P                         | 1.051       | 0.949 | 1.410 | 0.800 |
| <i>Mcts2</i>    | P                         | 0.967       | 1.033 | 1.327 | 1.007 |



|                 |   |       |       |       |       |
|-----------------|---|-------|-------|-------|-------|
| <i>Zdbf2</i>    | P | 0.983 | 1.017 | 1.259 | 0.908 |
| <i>Ube3a</i>    | M | 1.069 | 0.931 | 1.235 | 1.207 |
| <i>Begain</i>   | P | 1.142 | 0.858 | 1.197 | 1.002 |
| <i>Calcr</i>    | M | 0.877 | 1.123 | 1.195 | 0.554 |
| <i>Cmah</i>     | M | 1.010 | 0.990 | 1.138 | 0.979 |
| <i>Atp10a</i>   | M | 0.969 | 1.031 | 1.126 | 1.222 |
| <i>Mkrn3</i>    | P | 1.146 | 0.854 | 1.078 | 0.741 |
| <i>Zfp64</i>    | P | 1.035 | 0.965 | 1.058 | 1.338 |
| <i>Nap1l4</i>   | M | 0.977 | 1.023 | 1.029 | 0.876 |
| <i>Plagl1</i>   | P | 1.010 | 0.990 | 1.027 | 1.091 |
| <i>Jade1</i>    | P | 0.991 | 1.009 | 1.021 | 0.914 |
| <i>Slc38a4</i>  | P | 0.993 | 1.007 | 0.992 | 1.027 |
| <i>Pde4d</i>    | P | 1.040 | 0.960 | 0.977 | 1.282 |
| <i>Tbcd12</i>   | P | 1.028 | 0.972 | 0.976 | 0.716 |
| <i>Ipw</i>      | P | 0.944 | 1.056 | 0.972 | 0.922 |
| <i>Xlr3b</i>    | M | 0.880 | 1.120 | 0.951 | 0.732 |
| <i>Copg2</i>    | M | 0.967 | 1.033 | 0.906 | 0.897 |
| <i>Pegl2</i>    | P | 0.824 | 1.176 | 0.873 | 1.138 |
| <i>Igf2r</i>    | M | 1.008 | 0.992 | 0.838 | 0.657 |
| <i>Grb10</i>    | M | 0.984 | 1.016 | 0.829 | 0.355 |
| <i>Zrsr1</i>    | P | 1.016 | 0.984 | 0.794 | 0.888 |
| <i>Trappc9</i>  | M | 0.970 | 1.030 | 0.777 | 0.891 |
| <i>Ampd3</i>    | M | 1.067 | 0.933 | 0.769 | 1.015 |
| <i>Cdkn1c</i>   | M | 1.180 | 0.820 | 0.751 | 0.755 |
| <i>Commd1</i>   | M | 0.984 | 1.016 | 0.705 | 0.830 |
| <i>Phactr2</i>  | M | 1.015 | 0.985 | 0.698 | 1.051 |
| <i>Dio3</i>     | P | 1.058 | 0.942 | 0.673 | 0.554 |
| <i>Igf2</i>     | P | 1.384 | 0.616 | 0.639 | 0.598 |
| <i>Qpct</i>     | M | 1.087 | 0.913 | 0.630 | 0.837 |
| <i>Ascl2</i>    | M | 0.538 | 1.462 | 0.546 | 0.801 |
| <i>Ppp1r9a</i>  | M | 1.012 | 0.988 | 0.527 | 0.564 |
| <i>Cobl</i>     | M | 0.997 | 1.003 | 0.520 | 0.912 |
| <i>Dhcr7</i>    | M | 1.041 | 0.959 | 0.507 | 1.000 |
| <i>Slc22a18</i> | M | 1.036 | 0.964 | 0.479 | 0.894 |
| <i>Zim3</i>     | M | 1.117 | 0.883 | 0.383 | 0.683 |
| <i>Mst1r</i>    | M | 1.054 | 0.946 | 0.342 | 0.540 |
| <i>Art5</i>     | M | 0.973 | 1.027 | 0.316 | 0.653 |

**Table S5 (related to STAR METHODS)**

| <b>Primers for Genotyping</b>       |                  |                            |                        |
|-------------------------------------|------------------|----------------------------|------------------------|
| <b>Name</b>                         | <b>Direction</b> | <b>Sequence (5' to 3')</b> | <b>Position</b>        |
| <i>Naa10</i> -CU                    | Forward          | CTTACGGGGTGACCGTGTGA       | chrX 65174147-65174128 |
| <i>Naa10</i> -FD                    | Reverse          | GCTGCAATGACTAAGAGG         | chrX 65173836-65173853 |
| <i>Naa10</i> -JD                    | Reverse          | GACAACCTGGTTACTGACCA       | chrX 65170767-65170786 |
| M-Probe A                           | Forward          | TGAGGGAGGTTAGACACTG        | chrX 65163005-65163023 |
| M-Probe A                           | Reverse          | GTTGAGGCCAAAGAGGCTT        | chrX 65163470-65163488 |
| M-Probe B                           | Forward          | CTGAGATCAGCAGCGGAC         | chrX 65163536-65163553 |
| M-Probe B                           | Reverse          | CTTCCAGAGTCATAGCCCAT       | chrX 65164148-65164167 |
| <b>Primers for Quantitative PCR</b> |                  |                            |                        |
| <b>Name</b>                         | <b>Direction</b> | <b>Sequence (5' to 3')</b> | <b>Ref.</b>            |
| <i>Nanog</i>                        | Forward          | TCTTCCTGGTCCCCACAGTTT      |                        |
| <i>Nanog</i>                        | Reverse          | GCAAGAATAGTTCTCGGGATGAA    |                        |
| <i>Oct4</i>                         | Forward          | CACCATCTGTCGCTTCGAGG       |                        |
| <i>Oct4</i>                         | Reverse          | AGGGTCTCCGATTTGCATATCT     |                        |
| <i>H19</i>                          | Forward          | CCTTGTCGTAGAAGCCGTCTG      |                        |
| <i>H19</i>                          | Reverse          | GGGTAGCACCATTTCTTTCATCT    |                        |
| Allele-specific<br><i>H19</i>       | Forward          | TCCTTTTGTTCCTTCCTTGC       | Sharif et al. 2007     |
| Allele-specific<br><i>H19</i>       | Reverse          | TGATGGACCCAGGACCTCT        | Sharif et al. 2007     |
| <i>Kcnq1ot1</i>                     | Forward          | ATGGCCAGTGCCACTAGTTC       |                        |

|                                    |         |                        |                    |
|------------------------------------|---------|------------------------|--------------------|
| <i>Kcnq1ot1</i>                    | Reverse | TTTGCTTTCTCGTCGTCTCA   |                    |
| Allele-specific<br><i>Kcnq1ot1</i> | Forward | CCTCCTGCGAGTTTCTTGTC   | Sharif et al. 2007 |
| Allele-specific<br><i>Kcnq1ot1</i> | Reverse | TGGAACCTCCTTGGAAGATG   | Sharif et al. 2007 |
| <i>Igf2</i>                        | Forward | GTGCTGCATCGCTGCTTAC    |                    |
| <i>Igf2</i>                        | Reverse | ACGTCCTCTCGGACTTGG     |                    |
| <i>Cdkn1c</i>                      | Forward | CGAGGAGCAGGACGAGAATC   |                    |
| <i>Cdkn1c</i>                      | Reverse | GAAGAAGTCGTTTCGCATTGGC |                    |
| <i>Gapdh</i>                       | Forward | TTGCAGTGGCAAAGTGGAG    |                    |
| <i>Gapdh</i>                       | Reverse | CATGGTGGTGAAGACACCAG   |                    |

**Table S6 (related to STAR METHODS)**

| <b>Primers for Chromatin Immunoprecipitation</b> |                  |                            |                             |
|--------------------------------------------------|------------------|----------------------------|-----------------------------|
| <b>Name</b>                                      | <b>Direction</b> | <b>Sequence (5' to 3')</b> | <b>Position or Ref.</b>     |
| <i>Peg10</i> -DMR                                | Forward          | TACTGACCGAATTGTGATGAG      | chr6 4747860-4747880        |
| <i>Peg10</i> -DMR                                | Reverse          | CGCATGAAGCGCCTATTAGG       | chr6 4748026-4748007        |
| <i>Peg13</i> -DMR                                | Forward          | AAAGGAGGCACAGAAAAAGC       | ch15 72809661-72809642      |
| <i>Peg13</i> -DMR                                | Reverse          | TACAACCACAATGCGCCTAT       | ch15 72809468-72809487      |
| <i>Kcnqlot1</i> -DMR                             | Forward          | TCGAGTCCCAAGGTGAGTGG       | chr7 143295500-143295481    |
| <i>Kcnqlot1</i> -DMR                             | Reverse          | GACCCGATTCGGTTTCAGC        | chr7 143295401-143295419    |
| <i>Mest</i> -DMR                                 | Forward          | CGGGTGCTTGGC GAAAGCCGTCC   | chr6 30736490 - 30736512    |
| <i>Mest</i> -DMR                                 | Reverse          | CAAGAATTTGAGGGCGCACAGGG    | chr6 30736600 - 30736622    |
| <i>H19</i> -ICR                                  | Forward          | GTACAACACACATTTCTTGGG      | ch7 142336826-142336807     |
| <i>H19</i> -ICR                                  | Reverse          | ACTCAAAGCTTTGTCACAGC       | ch7 142336636 - 142336655   |
| <i>Peg3</i> -DMR                                 | Forward          | ATGGGGTCTTGGATTGGTTA       | chr7 6730500 - 6730481      |
| <i>Peg3</i> -DMR                                 | Reverse          | TAGTGCACCCACACTGAACC       | chr7 6730308-6730327        |
| <i>Snrpn</i> -DMR                                | Forward          | TGCATACTCAAGGCCAGGTTC      | chr7 60005915 - 60005935    |
| <i>Snrpn</i> -DMR                                | Reverse          | GCATATTGAAGTTACTACCAC      | chr7 60006059 - 60006079    |
| <i>Meg3</i> -IG-DMR                              | Forward          | GCCTGTAACCAATAGACCCAGAG    | chr12 109533876 - 109533898 |
| <i>Meg3</i> -IG-DMR                              | Reverse          | GAACACCCGATTA ACTGAGCAG    | chr12 109534007-109534028   |

|                                                       |                  |                               |                              |
|-------------------------------------------------------|------------------|-------------------------------|------------------------------|
| IAP-LTR1                                              | Forward          | TGGTAAACAAATAATCTGCGCAT<br>GA | Di Giacomo et al.,<br>2014   |
| IAP-LTR1                                              | Reverse          | CACTCCCTGATTGGCTGCAG          | Di Giacomo et al.,<br>2014   |
| IAP-LTR2                                              | Forward          | GTGAGAACGCGTCGAATAACAAT       | Di Giacomo et al.,<br>2014   |
| IAP-LTR2                                              | Reverse          | GTGATCCGTAGTTCTGGTTCTGA       | Di Giacomo et al.,<br>2014   |
| 5'-LINE-L1                                            | Forward          | TGCGGTACATAGGGAAGCAGG         | Di Giacomo et al.,<br>2014   |
| 5'-LINE-L1                                            | Reverse          | CAAGACTCTGCTGGCAAGGTA         | Di Giacomo et al.,<br>2014   |
| 3'UTR-LINE<br>-L1                                     | Forward          | CCAAGGAGCTAAAGGGATCTG         | Di Giacomo et al.,<br>2014   |
| 3'UTR-LINE<br>-L1                                     | Reverse          | CCGACTAGGCCATCTTTTGAT         | Di Giacomo et al.,<br>2014   |
| <i>Cyp26a1</i>                                        | Forward          | GGAGCCTCTGGTCTCCTTAG          | Chr19 37697062 -<br>37697081 |
| <i>Cyp26a1</i>                                        | Reverse          | TCCTGCTTTCGAGTTCAAAG          | Chr19 37697163 -<br>37697182 |
| <i>Ereg</i>                                           | Forward          | GGGAGTAGCCACACTAGAAG          | Chr5 91074409 -<br>91074428  |
| <i>Ereg</i>                                           | Reverse          | GTTTCCTAATGCCACCCCCC          | Chr5 91074519 -<br>91074538  |
| <i>Pcdh7</i>                                          | Forward          | GGACTCTGGCAGTCCCAGCC          | Chr5 57720628 -<br>57720647  |
| <i>Pcdh7</i>                                          | Reverse          | CTCTGGAAAGTAAACCTCAACC        | Chr5 57720721 -<br>57720742  |
| <i>Rps6ka4</i>                                        | Forward          | CCCCTGACACCCCACCCATC          | Chr19 6837485 -<br>6837504   |
| <i>Rps6ka4</i>                                        | Reverse          | GCGCCCAACCTCTTCTTAGG          | Chr19 6837373 -<br>6837392   |
| <b>Primers for ChIP Followed by Sanger Sequencing</b> |                  |                               |                              |
| <b>Name</b>                                           | <b>Direction</b> | <b>Sequence (5' to 3')</b>    | <b>Position</b>              |
| <i>Pegl3</i> -DMR                                     | Forward          | TGTGTGATAGCTCATCCAAGC         | chr15 72809842-<br>72809822  |

|                          |         |                       |                              |
|--------------------------|---------|-----------------------|------------------------------|
| <i>Pegl3</i> -DMR        | Reverse | CTACAACCACAATGCGCCTA  | chr15 72809467-<br>72809486  |
| <i>Kcnqlot1</i> -<br>DMR | Forward | CAGCGCGGGTTTCTTCTCTG  | chr7 143295827-<br>143295808 |
| <i>Kcnqlot1</i> -<br>DMR | Reverse | GACCCGATTCGGTTTCAGC   | chr7 143295401-<br>143295419 |
| <i>H19</i> -ICR          | Forward | GGGTCACAAATGCCACTAGG  | chr7 142581935-<br>142581916 |
| <i>H19</i> -ICR          | Reverse | AGCCCATGACTATGGGATCA  | chr7 142581701-<br>142581720 |
| <i>Snrpn</i> -DMR        | Forward | GGACTCCTGGAAGTCAGAGC  | chr7 60004742 -<br>60004723  |
| <i>Snrpn</i> -DMR        | Reverse | CCCAGACCACACAAGCTG    | chr7 60004300 -<br>60004317  |
| <i>Mest</i> -DMR         | Forward | TCTGGGGTTCAGGATTAGAGA | chr6 30737845 -<br>30737865  |
| <i>Mest</i> -DMR         | Reverse | AGCAGAGGCAGCAAGCAG    | chr6 30738177 -<br>30738160  |

**Table S7 (related to STAR METHODS)**

| <b>Primers for Bisulfite Sequencing</b>                         |                  |                                        |                       |
|-----------------------------------------------------------------|------------------|----------------------------------------|-----------------------|
| <b>Name</b>                                                     | <b>Direction</b> | <b>Sequence (5' to 3')</b>             | <b>Ref.</b>           |
| <i>H19</i> -ICR                                                 | Forward          | AGGGTATTTATATTTAGGATTTAAAGGAA<br>TATG  | Sharif et al.<br>2007 |
| <i>H19</i> -ICR                                                 | Reverse          | TTTATCAAAAACATAACATAAACCCCTAAC<br>C    | Sharif et al.<br>2007 |
| <i>Kcnq1ot1</i> -DMR                                            | Forward          | ATTTTTGTGGTTTAGGTTTATAGAAGTAGG<br>G    |                       |
| <i>Kcnq1ot1</i> -DMR                                            | Reverse          | TACTCCACTCACTACCTTAATACTAACC           |                       |
| <i>Peg13</i> -DMR                                               | Forward          | GGTTTTGTGTGATAGTTTATTTAAG              |                       |
| <i>Peg13</i> -DMR                                               | Reverse          | TAACTCATCATTATACTACAACCAC              |                       |
| <b>Primers for the EMSA Probe and Site-directed Mutagenesis</b> |                  |                                        |                       |
| <b>Name</b>                                                     | <b>Direction</b> | <b>Sequence (5' to 3')</b>             | <b>Ref.</b>           |
| <i>H19</i> -ICR (189 bp)-Bio                                    | Forward          | Biotin-GTACAACACACATTTCTTGGG           |                       |
| <i>H19</i> -ICR (189 bp)                                        | Reverse          | ACTCAAAGCTTTGTCACAGC                   |                       |
| hNaa10p S37P                                                    | Forward          | CTTCTACCATGGCCTTCCCTGGCCCCAGCT<br>C    | Rope et al.<br>2011   |
| hNaa10p V107F                                                   | Forward          | CTTCAATGCCAAATATTTCTCCCTGCATGT<br>CAGG | Popp et al.<br>2015   |
| hNaa10p R116W                                                   | Forward          | CATGTCAGGAAGAGTAACTGGGCCCGCCCT<br>GCAC | Popp et al.<br>2015   |

Figure S1 (related to Figure 1)

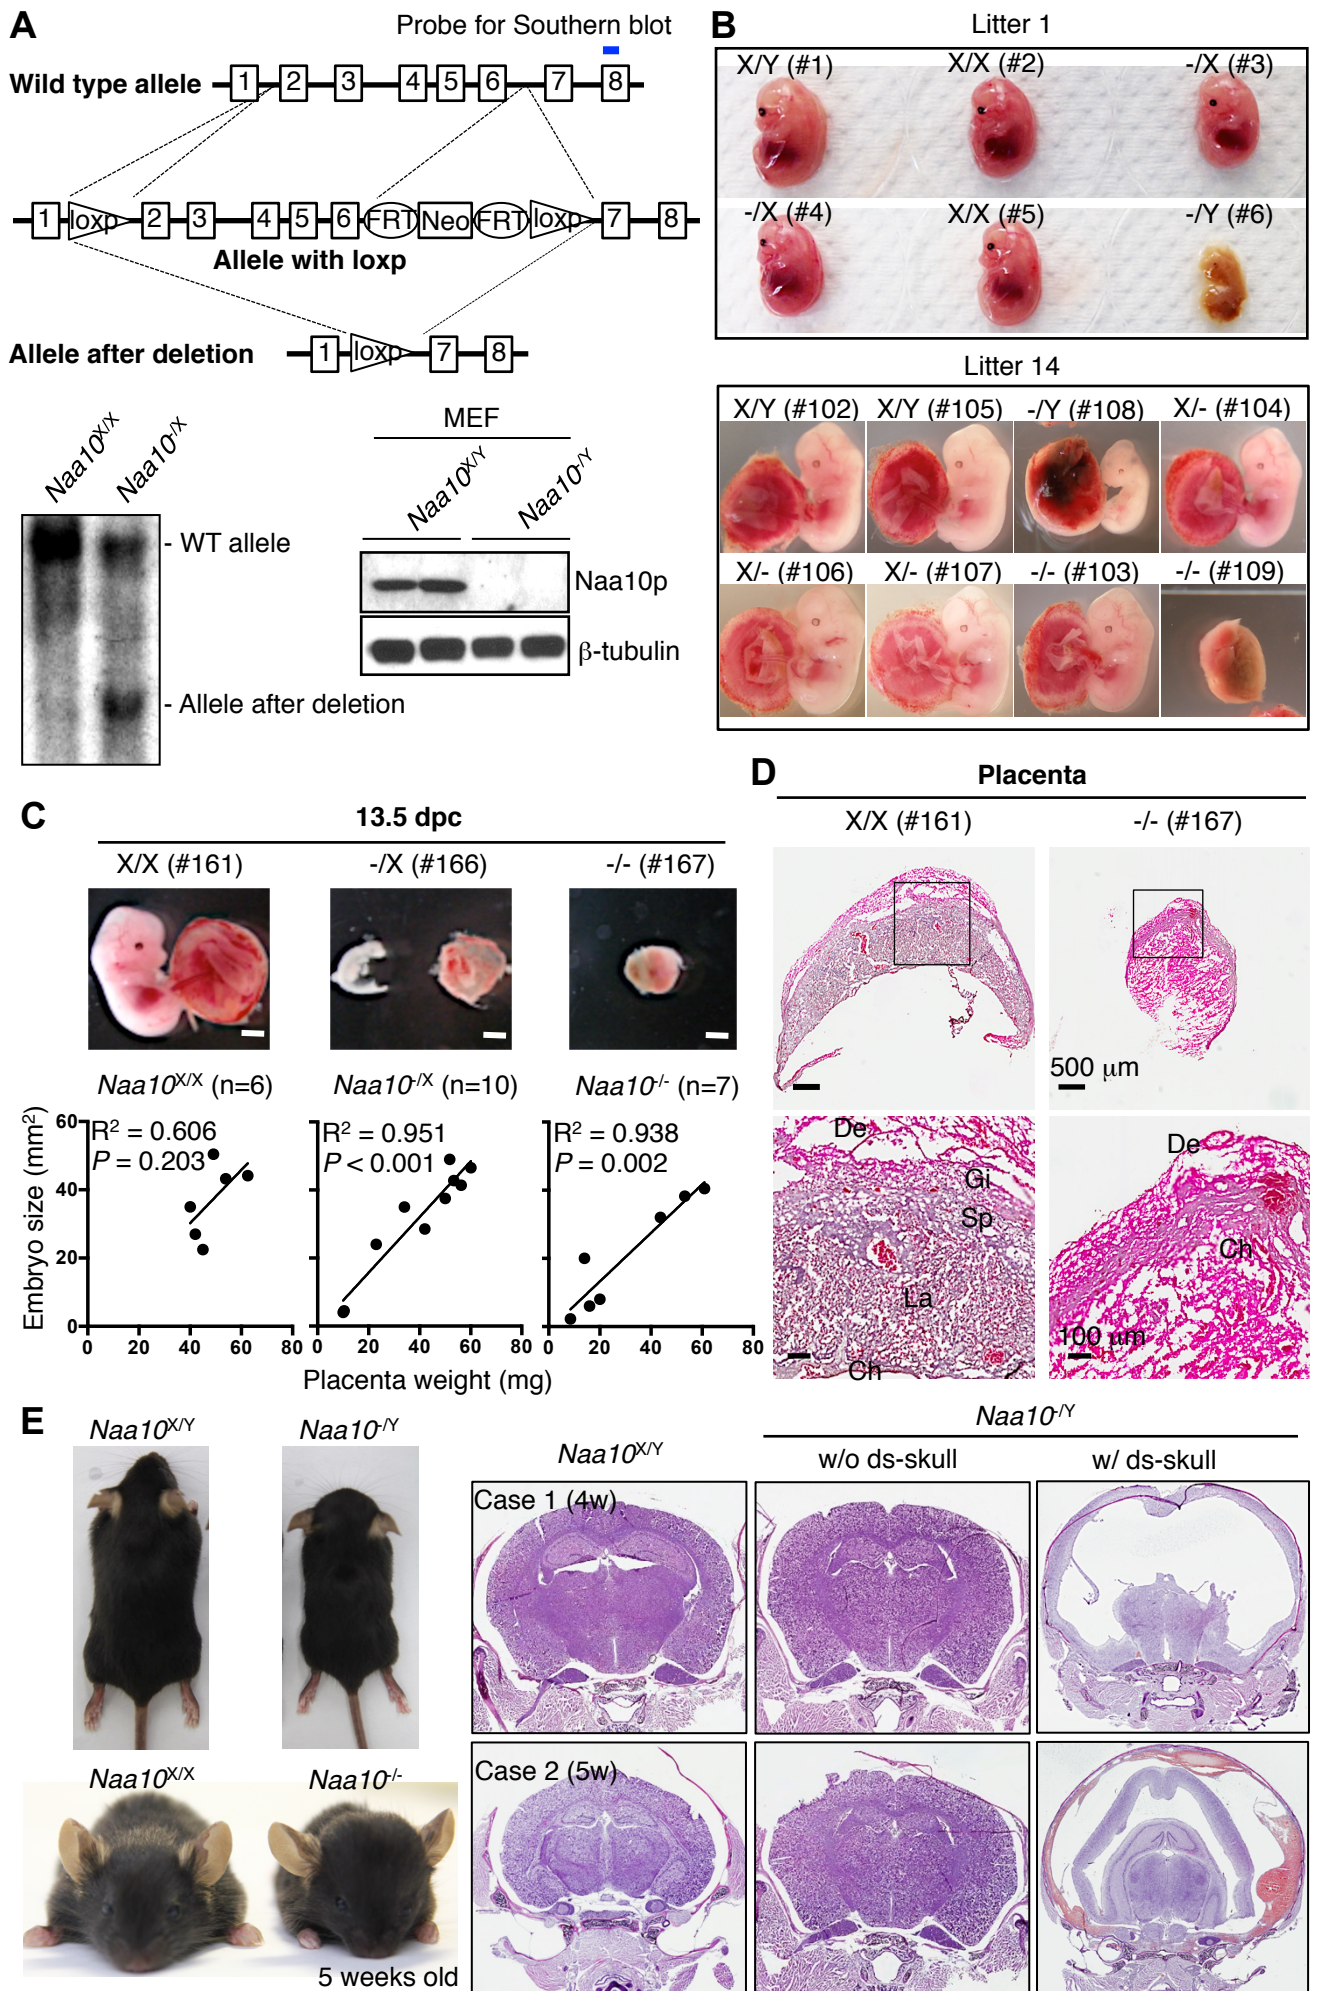



Figure S2 (related to Figure 2)

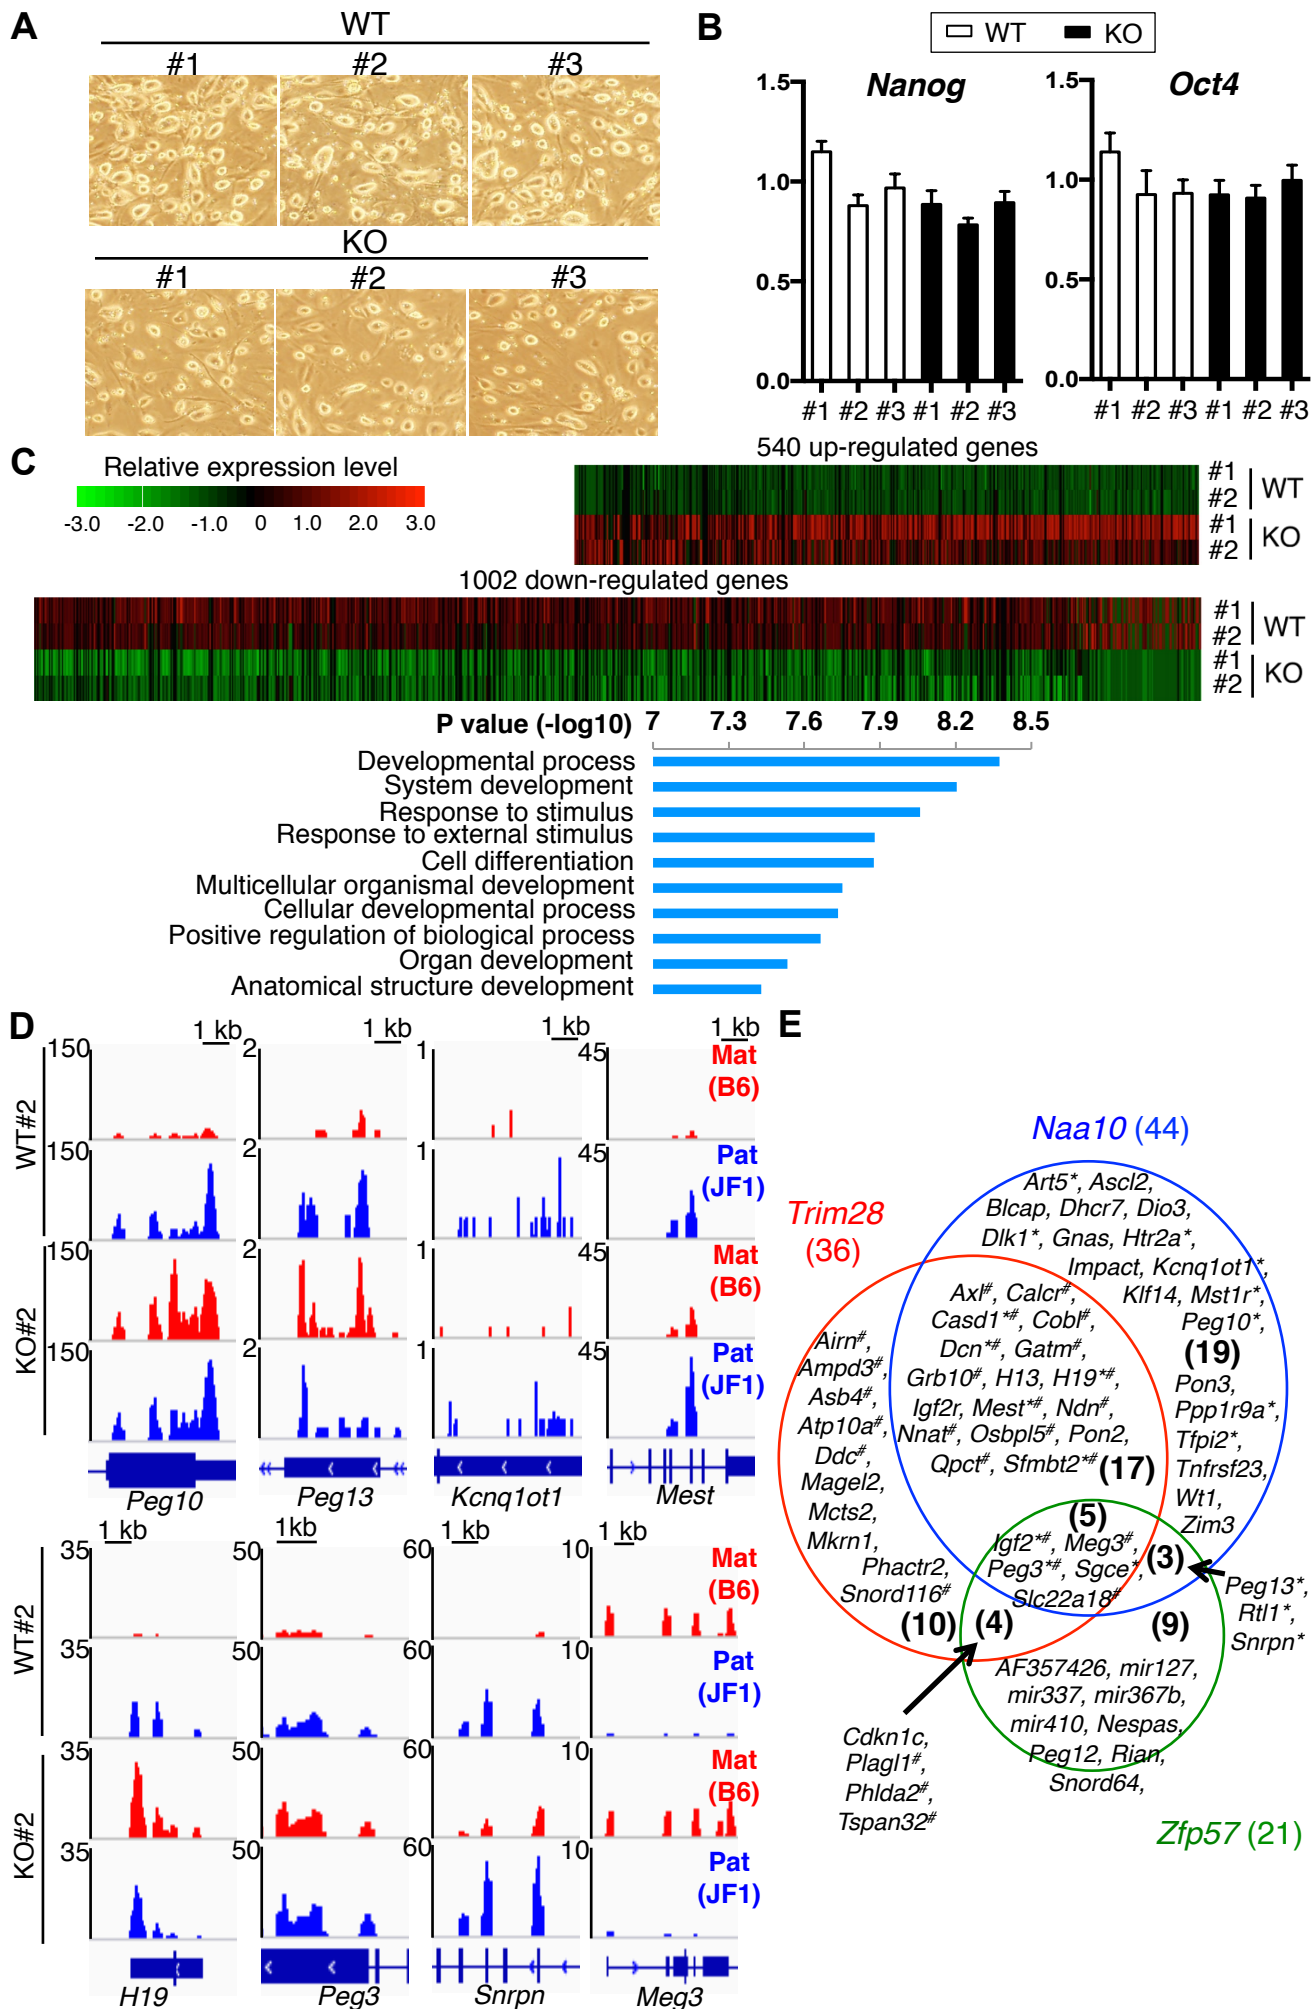

Figure S3 (related to Figure 3)

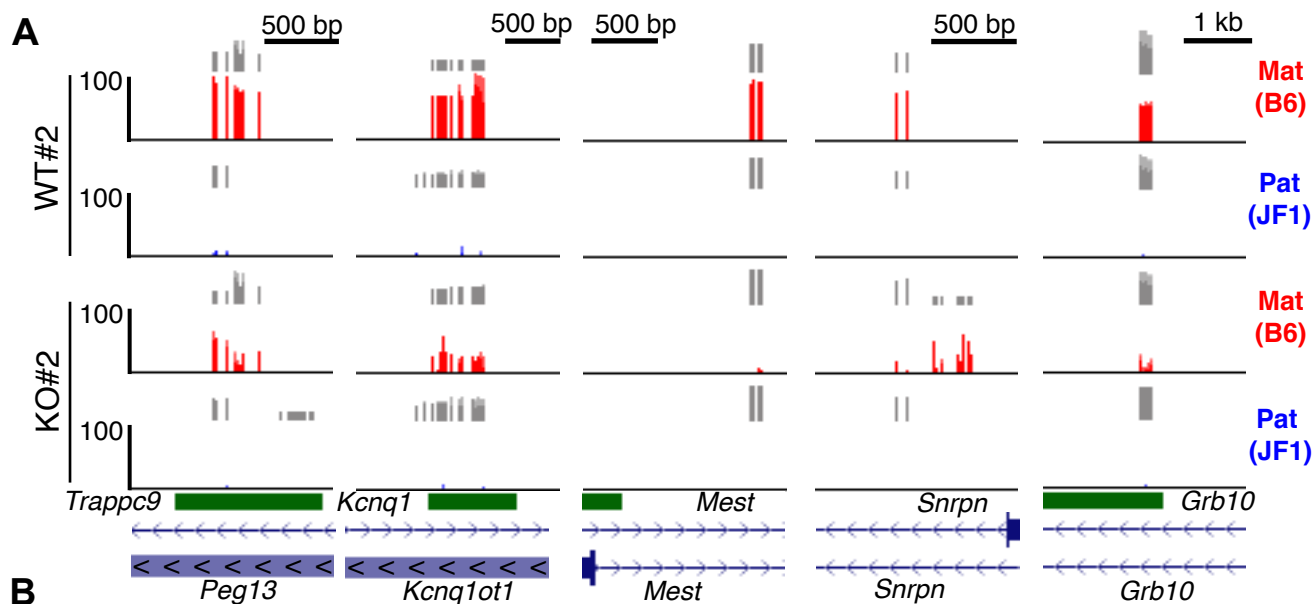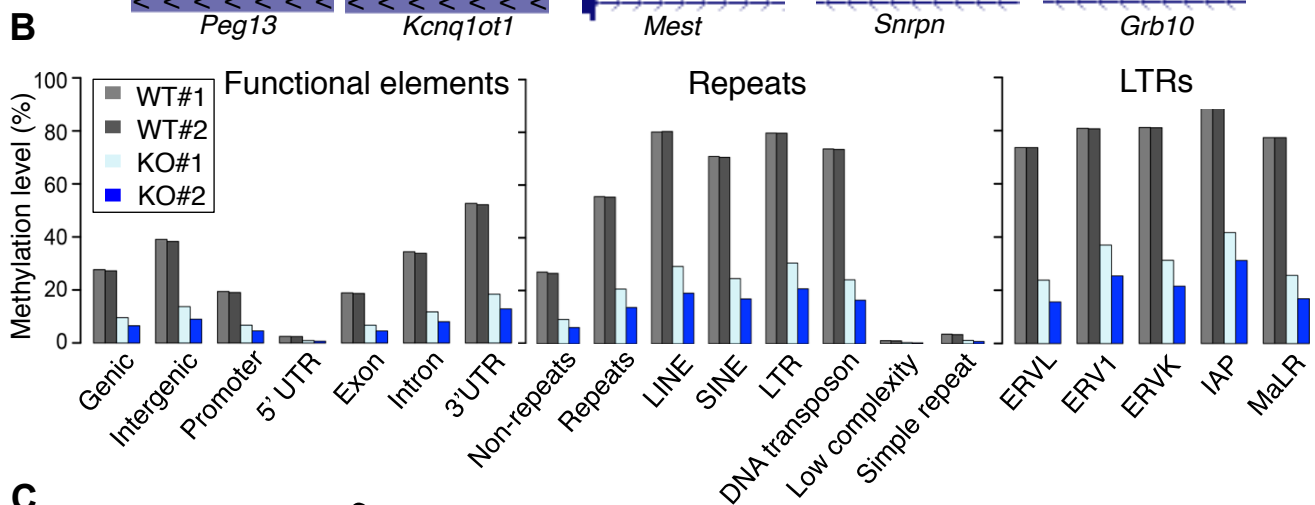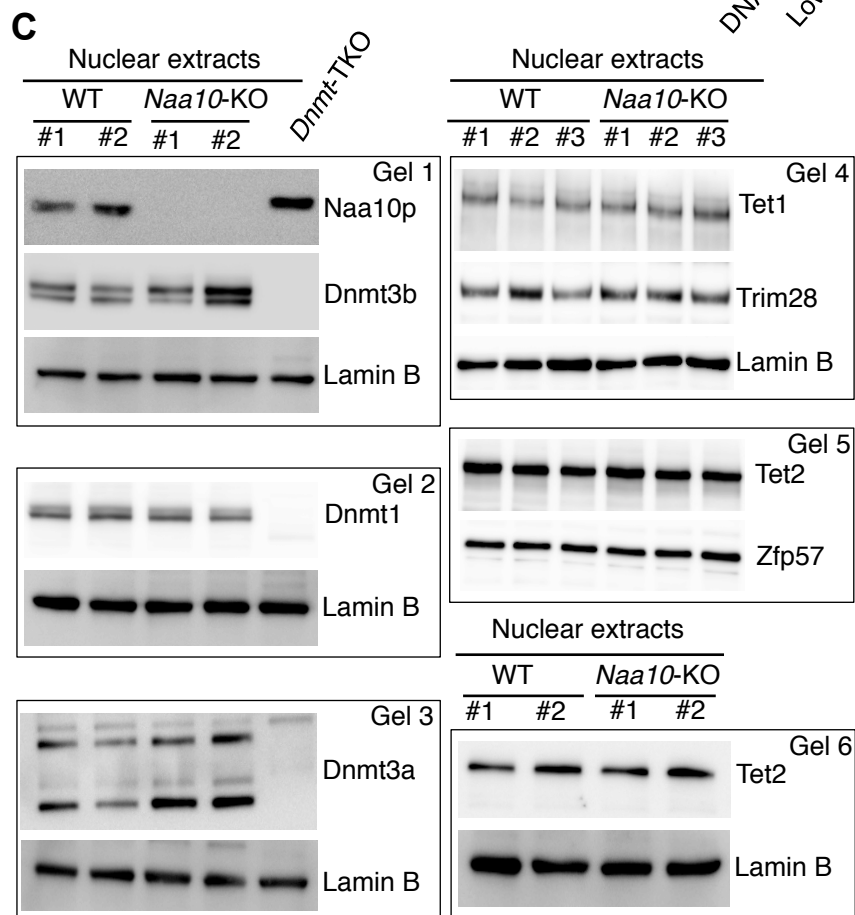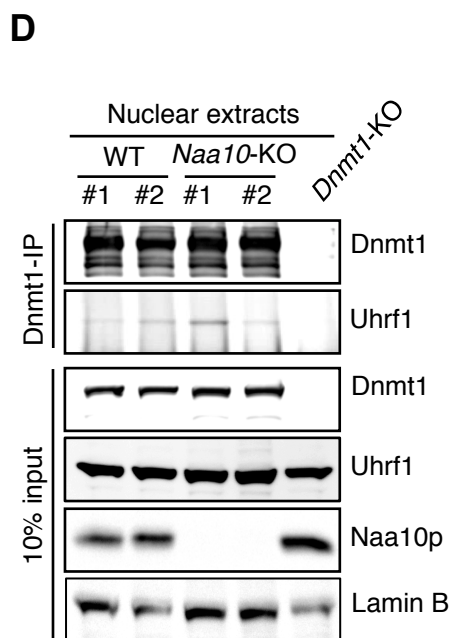

Figure S4 (related to Figure 4)

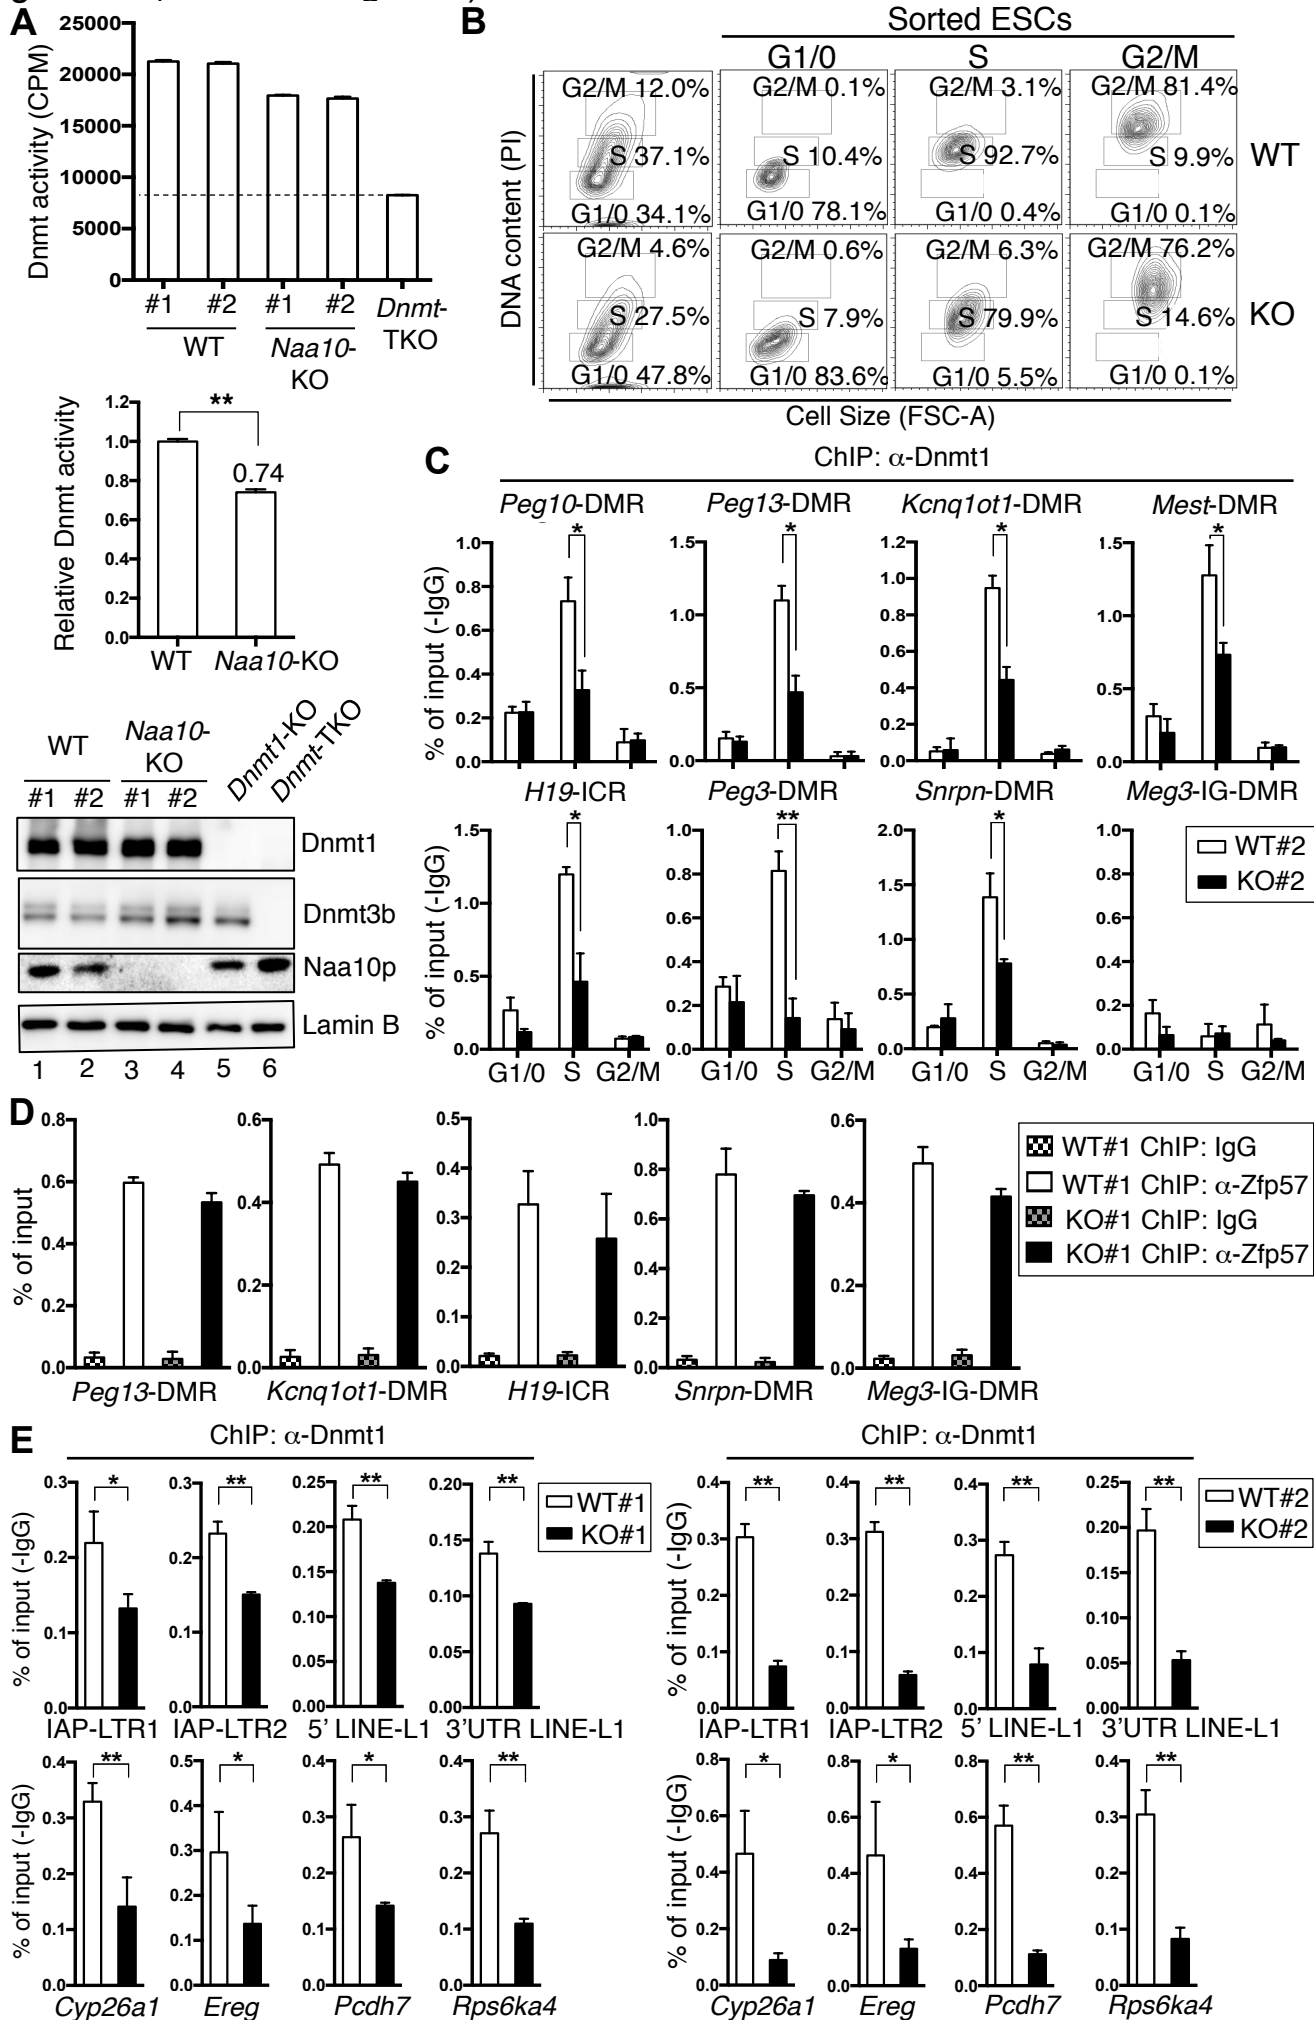

Figure S5 (related to Figures 5)

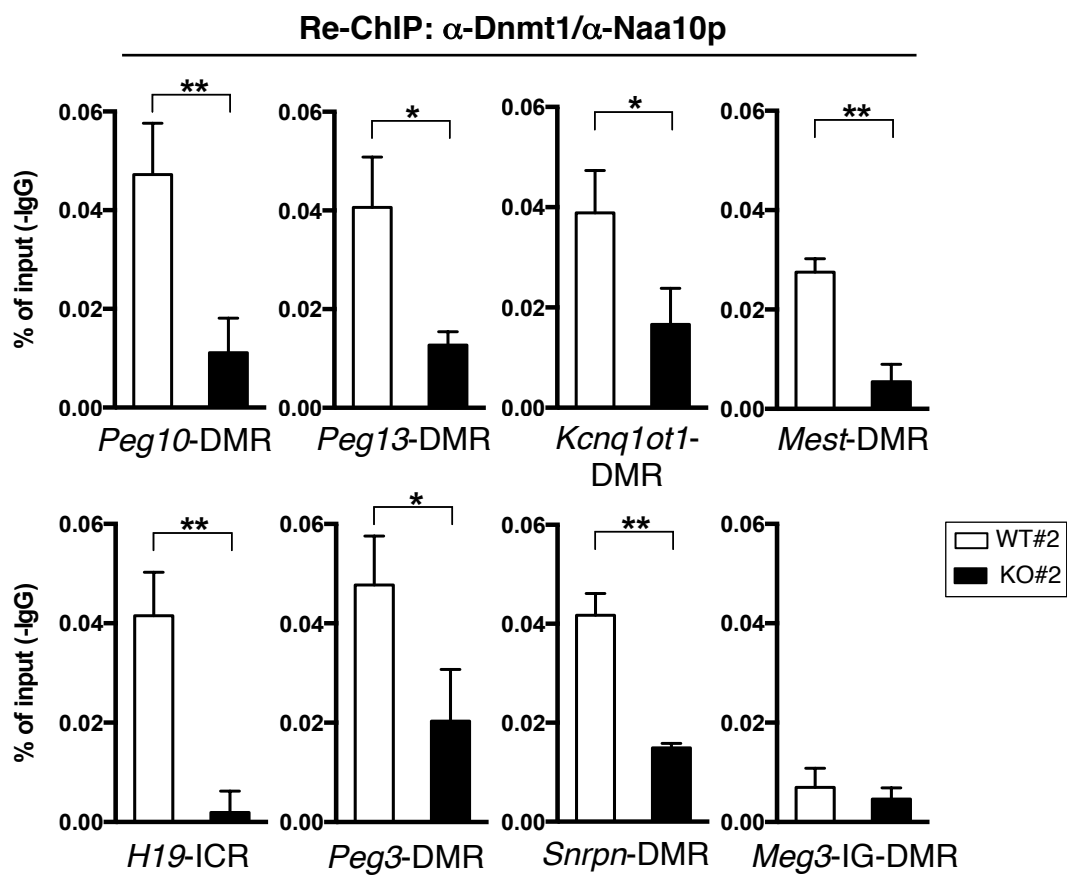

Figure S6 (related to Figure 6)

**A**

**Genome Background**

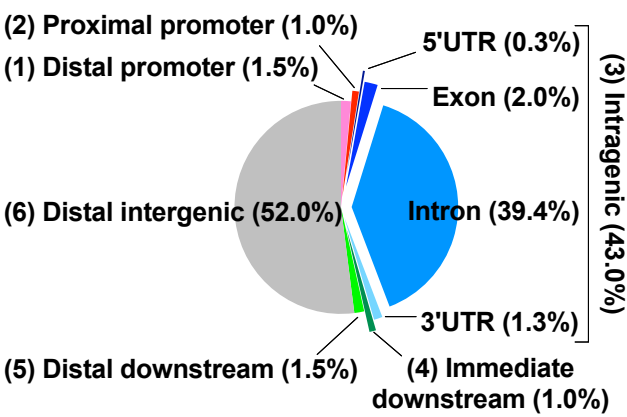

**Naa10p-peak Distribution**

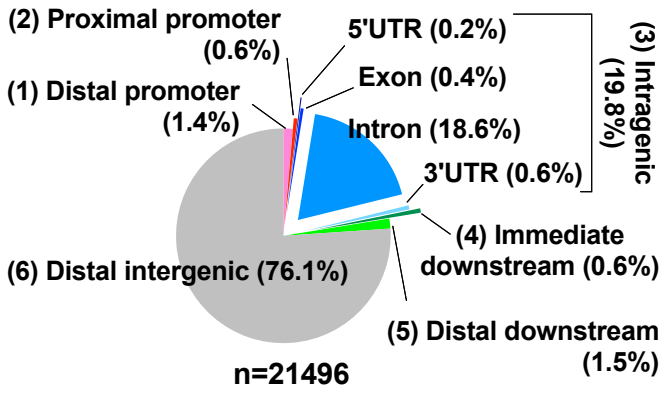

**B**

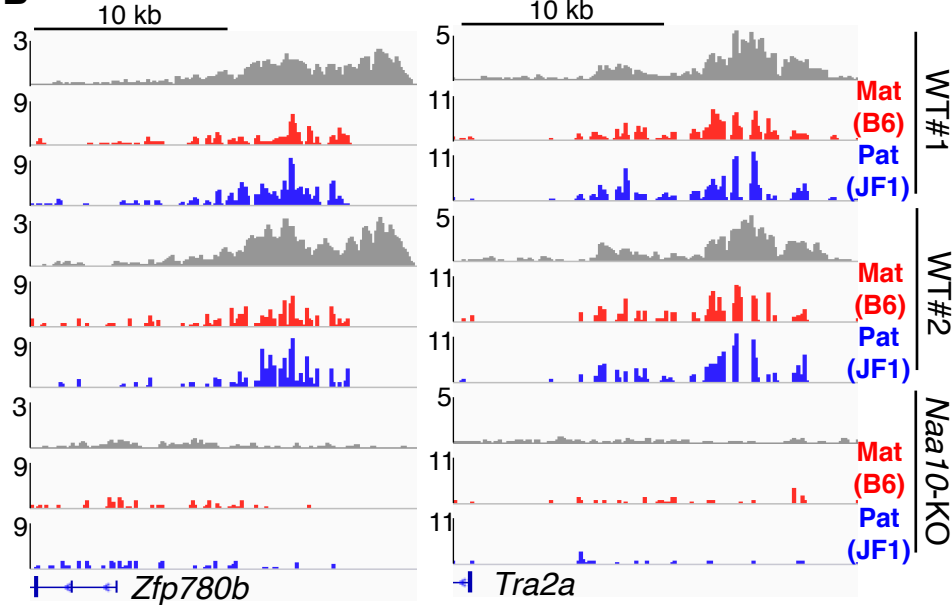

**C**

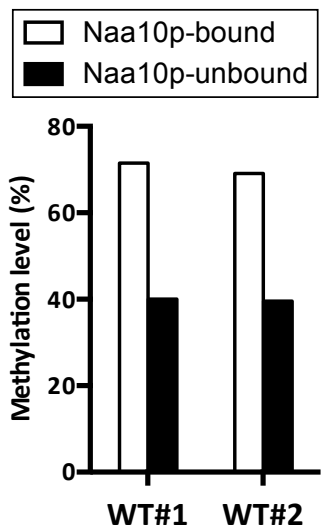

**D**

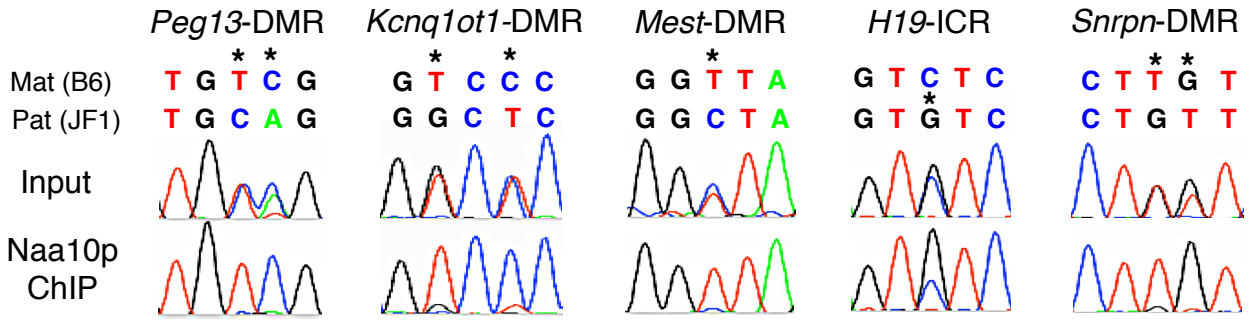

Figure S7 (related to Figure 7)

**A**

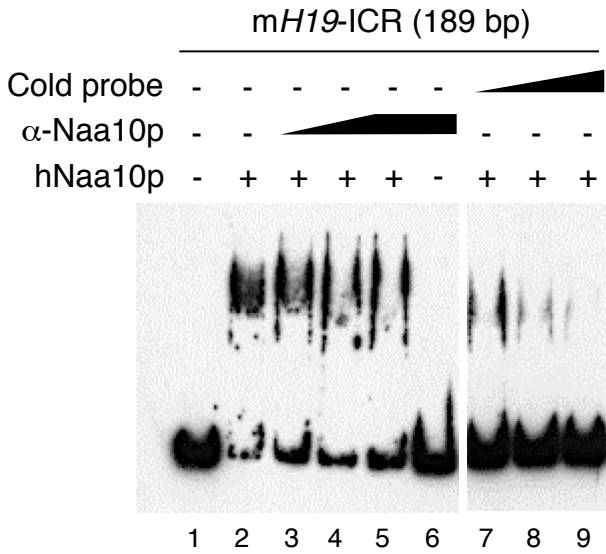

**B**

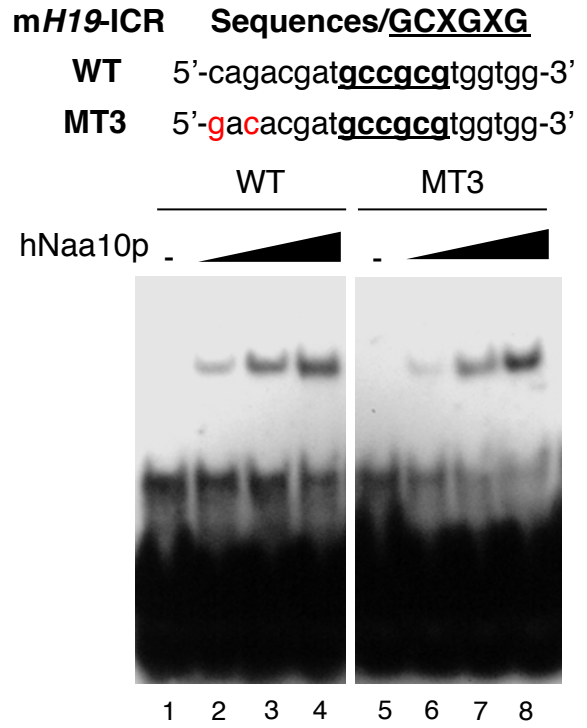

**C**

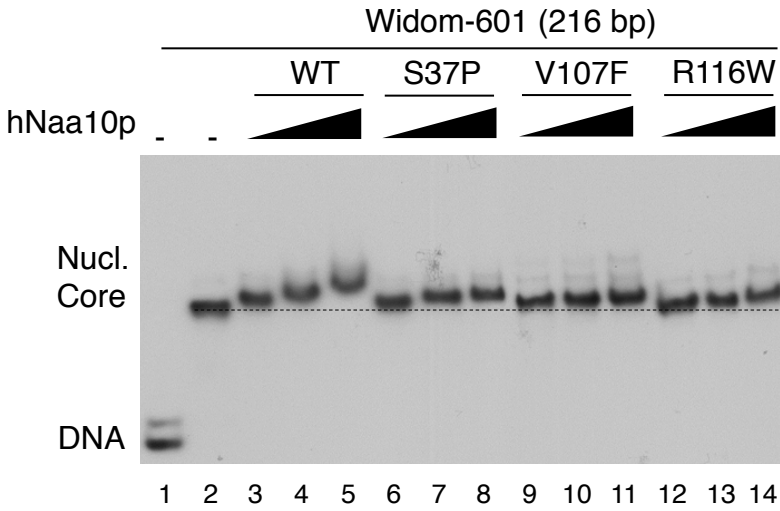

**D**

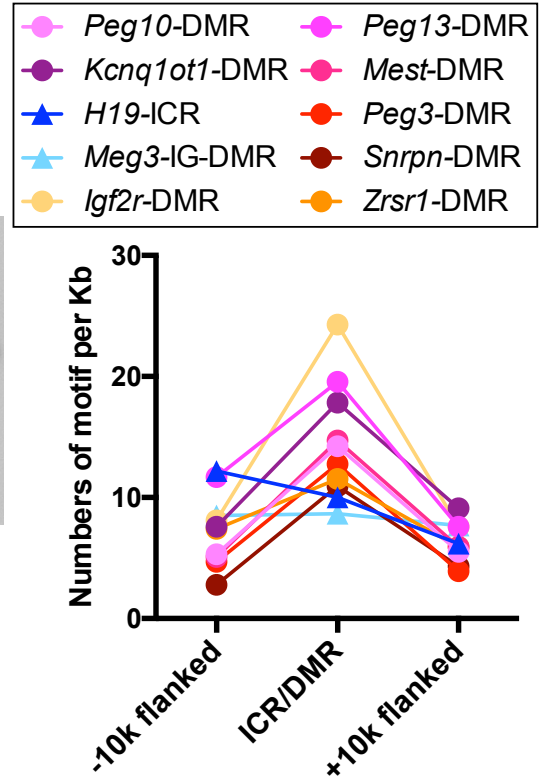

Supplement: NIHMS1002823-supplement-1.pdf [file NIHMS1002823-supplement-1.pdf]
